# Supplementary material for: GM-CSF primes cardiac inflammation in a mouse model of Kawasaki disease
Source: PubMed Central journal article supplement — J Exp Med. 2016 Sep 19;213(10):1983–98. doi: 10.1084/jem.20151853 (PMC5030799; doi:10.1084/jem.20151853), 2016-09-19
Supplement: JEM_20151853_sm.pdf [file JEM_20151853_sm.pdf]

SUPPLEMENTAL MATERIAL

Stock et al., <http://www.jem.org/cgi/content/full/jem.20151853/DC1>

Table S1. Primer sequences for real-time qPCR

| Gene           | Forward primer (5'-3')   | Reverse primer (5'-3')  | Amplicon |
|----------------|--------------------------|-------------------------|----------|
| Gapdh          | CCAGGTTGTCTCCTGCGACTT    | CCTGTTGCTGTAGCCGTATTCA  | 133      |
| IL-1 $\alpha$  | AACGTCAAGCAACGGGAAG      | AAGGTGCTGATCTGGGTGG     | 125      |
| IL-1 $\beta$   | GCTACCTGTGCTTTCCCGT      | ATCTCGGAGCCTGTAGTGC     | 163      |
| IL-3           | GGTCTTGCCAGCTCTACCA      | GTATCCCGCCACTGATTGA     | 99       |
| IL-4           | ATGGATGTGCCAAACGCTCT     | AAGCACCTTGAAGCCCTAC     | 78       |
| IL-5           | AGCAATGAGACGATGAGGCT     | AGCATTTCACAGTACCCCC     | 125      |
| IL-6           | AGAGTTGTGCAATGGCAATT     | TCATGTACTCCAGGTAGCTATGG | 182      |
| IL-10          | TAAGGTGGCCACACTTGAG      | GTTTTAGGGATGAAGCGG      | 209      |
| IL-17 $\alpha$ | TCATCCCTCAAAGCTCAGCG     | TTCATTGCGGTGGAGATCC     | 113      |
| IL-17f         | GAAGTGACCCCGTAAACAG      | TTTGGGGTTCTTCCGAGCTG    | 97       |
| IL-18          | GGCTGCCATGTCAGAAGACT     | CAGTCTGGTCTGGGGTTCAC    | 241      |
| IL-22          | TTGACACTTGTGCGATCTCT     | CCTTAGCACTGACTCCTCGG    | 280      |
| IL-33          | AACTTCTCTGCTATCCACG      | TCATTGTATGTACTCAGGGAGCC | 143      |
| TNF $\alpha$   | ACTGAACTTCGGGGTGATCG     | TGATCTGAGTGTGAGGGTCTGG  | 97       |
| Cox2           | CTTCGGGAGCACAACAGAGT     | AAGTGGTAACCGCTCAGGTG    | 155      |
| 5L0            | CTACGATGTCACCGTGGATG     | GTGCTGCTTGAAGATGTGAA    | 235      |
| FLAP           | TGAAGCAAGCATGGATCAAG     | AAGTGGGTACGCATCTACG     | 209      |
| LT4AH          | CCTTGGGGCACATAAAGCGA     | TGAATGCAGAGCCGTAACCA    | 94       |
| LTC4S          | GCTCTTCTGGCTACCGTCAC     | CAGGTAGAACAGTCCGCACA    | 246      |
| VEGF $\alpha$  | ACGATGAAGCCCTGGAGTGC     | TGTGCTGTAGGAAGCTCATCTC  | 114      |
| MMP2           | ACAAGTATGAGAGTGCACCAG    | GTGTAGATCGGGGCCATCAG    | 205      |
| MMP9           | TAAGGACGGCAAATTTGGTT     | CTTTAGTGGTGCAGGCAGAG    | 128      |
| IFN- $\alpha$  | ACCTCCACCAGCAGCTCAATGACC | AGCACATTGGCAGAGGAAGACAG | 214      |
| IFN- $\beta$   | CGTGGGAGATGTCCTCAACT     | AGATCTCTGCTCGGACCACC    | 117      |
| IFN- $\gamma$  | TCTTGATATCTGGAGAACTGG    | AGCTCATTGAATGCTTGGC     | 253      |
| M-CSF          | GATGTGGTGACCAAGCCTGA     | AATCATCCAAGCCAAGCCA     | 133      |
| G-CSF          | AGTGAGGAAGATCCAGGCCAGC   | AGAGCAGCCACTCAGGGAAGC   | 136      |
| GM-CSF         | CCAGCTCTGAATCCAGTCTCTC   | TCTCTCGTTTGTCTTCCGCTGT  | 172      |
| Ccl1           | TGCTGCTGGCTGCCGTGTGG     | TTGAGGCGCAGCTTTCTCTACC  | 198      |
| Ccl2           | TCTTTCTCCACCACCATTGC     | AGCTTCTTTGGGACACCTGCTG  | 206      |
| Ccl3           | TCTCCACCACATGCCCTTGC     | AGGCAGTCGGGGTGTGAGC     | 96       |
| Ccl4           | ACACCTCCCGGAGCTTCCAC     | AGAAGCATCAGGGCTGAGGAGG  | 231      |
| Ccl5           | CCTCGTGCCACGTCGAAGG      | TGGCACACACTTGGCGGTTCC   | 97       |
| Ccl7           | TCTGCCACGCTTCTGTGCC      | AACAGCTTCCAGGGACACCG    | 178      |
| Ccl17          | TGCTGCCTGGATTACTTCAAAGG  | AGCCCTGGCTTCTCAAATGC    | 220      |
| Ccl22          | ACTACATCCGTACCCTCTGC     | TAGCTTCTTACCAGACCTGC    | 146      |
| Cxcl1          | ATCCAGAGCTTGAAGGTGTTGC   | AAGGCAAGCCTCGCGACC      | 90       |
| Cxcl2          | AGTTTGCCTTGACCTGAAGC     | AGGCTCCTCTTCCAGG        | 94       |
| Cxcl3          | TCACCACAGCCCTTCGCAC      | TCACCGTCAAGCTCTGGATGG   | 229      |
| Cxcl4          | GTCGCTGGGTGTTTCGAG       | ATAGGGGTGCTTCCCGTCC     | 277      |
| Cxcl5          | TTGGAGGTGATCCCTGCAGGTC   | ATCACAGGAGCTTCTGGATCCAG | 101      |
| Cxcl9          | TGAAGTCCGCTGTTCTTTTCC    | AGTGATCGTGCCTCGGCTG     | 123      |
| Cxcl10         | GTCCTAATTGCCCTTGGT       | TCTTGCTTCGGCAGTTAC      | 119      |
| Cxcl12         | ATCGCCAGAGCCAACGTCAAGC   | TGCCCTTGCATCTCCACG      | 226      |
| Ccr1           | TCAACTCCATCCAACCCCTCC    | TGCTCACCAAGTGGCCAATTCC  | 145      |
| Ccr2           | TCAGTGCCTGCAAAGACCAG     | ACGGTGTGGTGGCCCTTC      | 201      |
| Ccr3           | ATGAGTGGGACCACCCTGTG     | CATGTTGCCAGGAGGCCGA     | 107      |
| Ccr4           | TACCCGAGCGGACGATTTC      | AAGGAGTAGAGAGGAGGAGG    | 168      |
| Ccr5           | TGAGACATCCGTTCCCTTAC     | TGCTGACATACCATAATCGATG  | 103      |
| Cxcr2          | TACCTGGCCATTGTACATGC     | TCAAACGGGATGTATTGTTACC  | 190      |
| Cxcr3          | AGCCGGAGCACCAGCCAAGC     | TGTAGAGGGCTGGCAGGAAGG   | 199      |
| Cxcr4          | TGAGGCGTTTGGTGCTCC       | ATGAAGTAGATGTTGGGACGG   | 197      |
| human Gapdh    | TGCACCACCAACTGCTTAGC     | GGCATGGACTGTGGTCATGAG   | 87       |
| human GM-CSF   | GCCAGCCACTACAAGCAGCAC    | CAAAGGGGATGACAAGCAGAAG  | 118      |
